# Supplementary material for: Isolated unilateral temporalis muscle hypertrophy in a child: a case report with literature review
Source: PubMed Central journal article supplement (PMC5817789; doi:10.1186/s12887-018-1061-7), 2018-02-19
Supplement: 12887_2018_1061_MOESM1_ESM.pdf [file 12887_2018_1061_MOESM1_ESM.pdf]

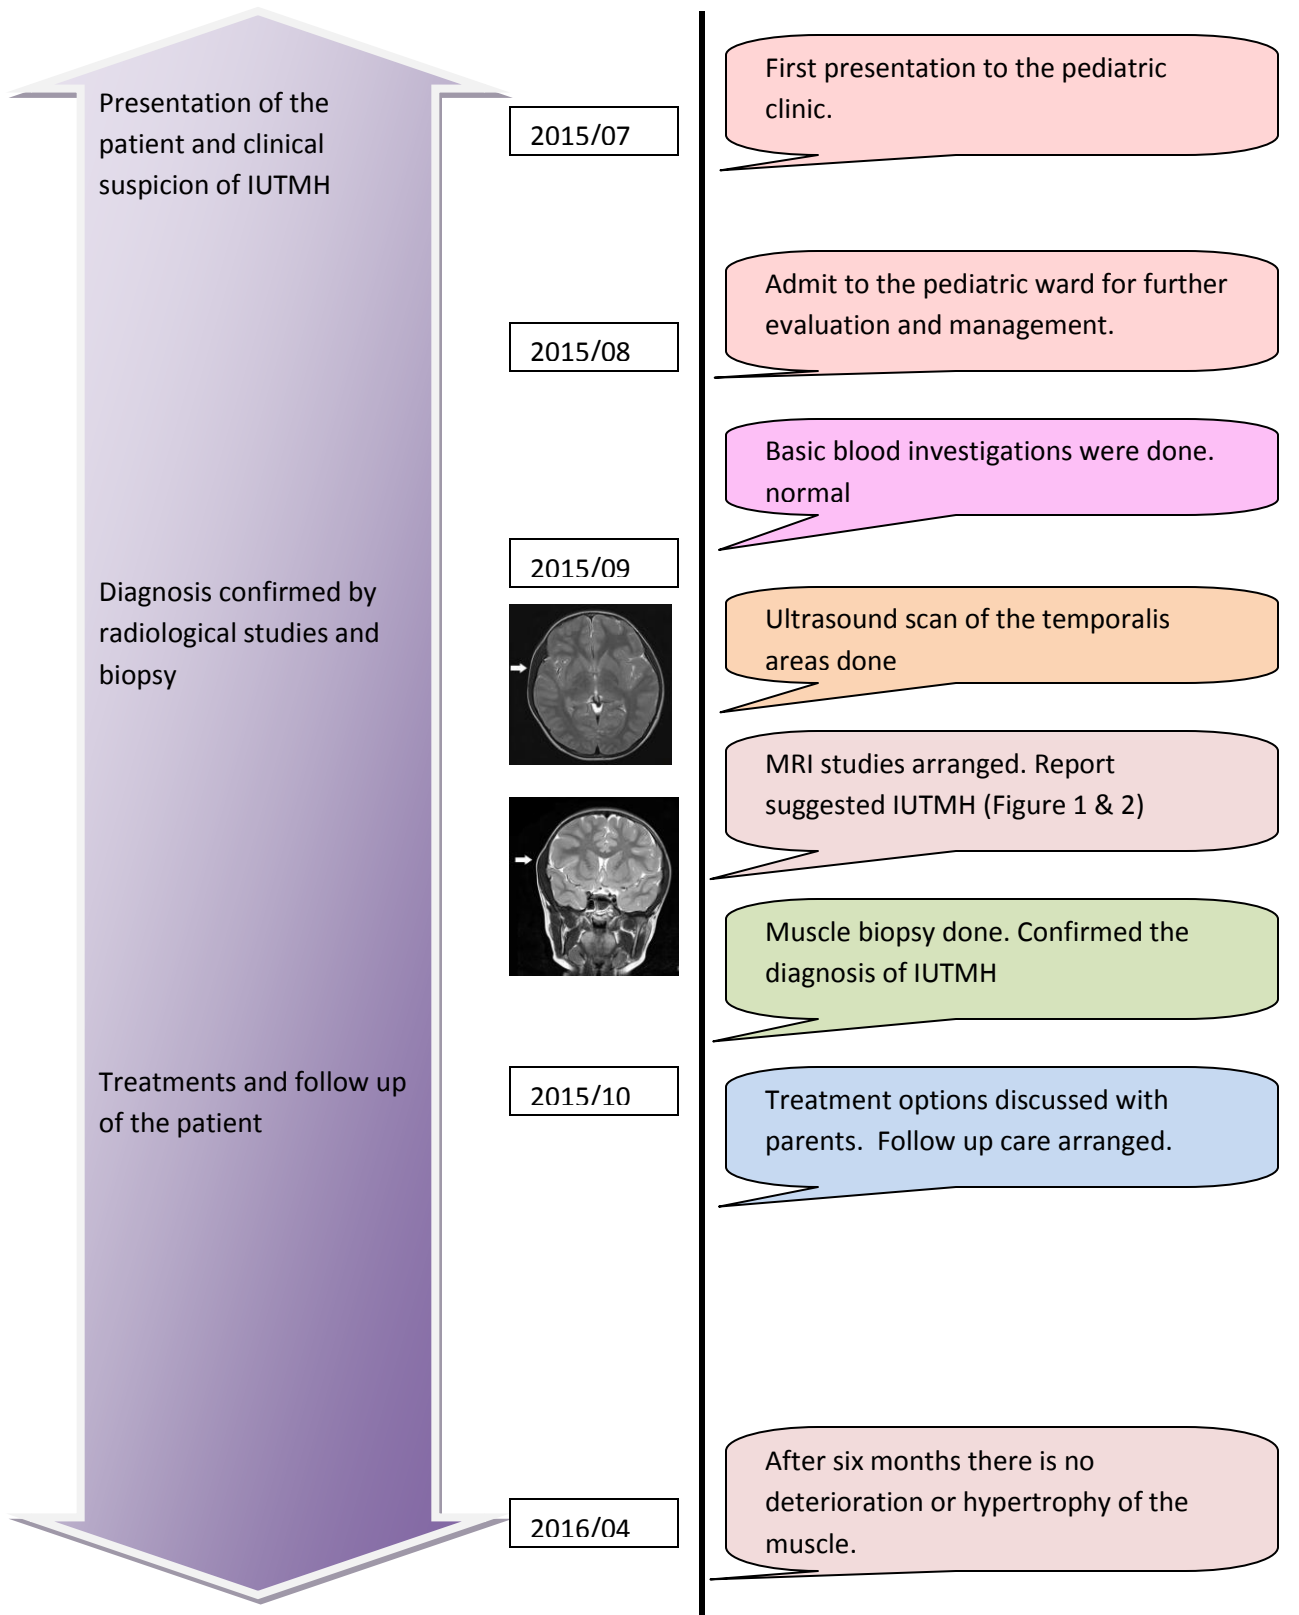

**Figure 3. Timeline of events.**
